# Supplementary material
Source: Frontiers journal article supplement (https://www.frontiersin.org/articles/315724)
Supplement: Data_Sheet_1.PDF [file Data_Sheet_1.PDF]

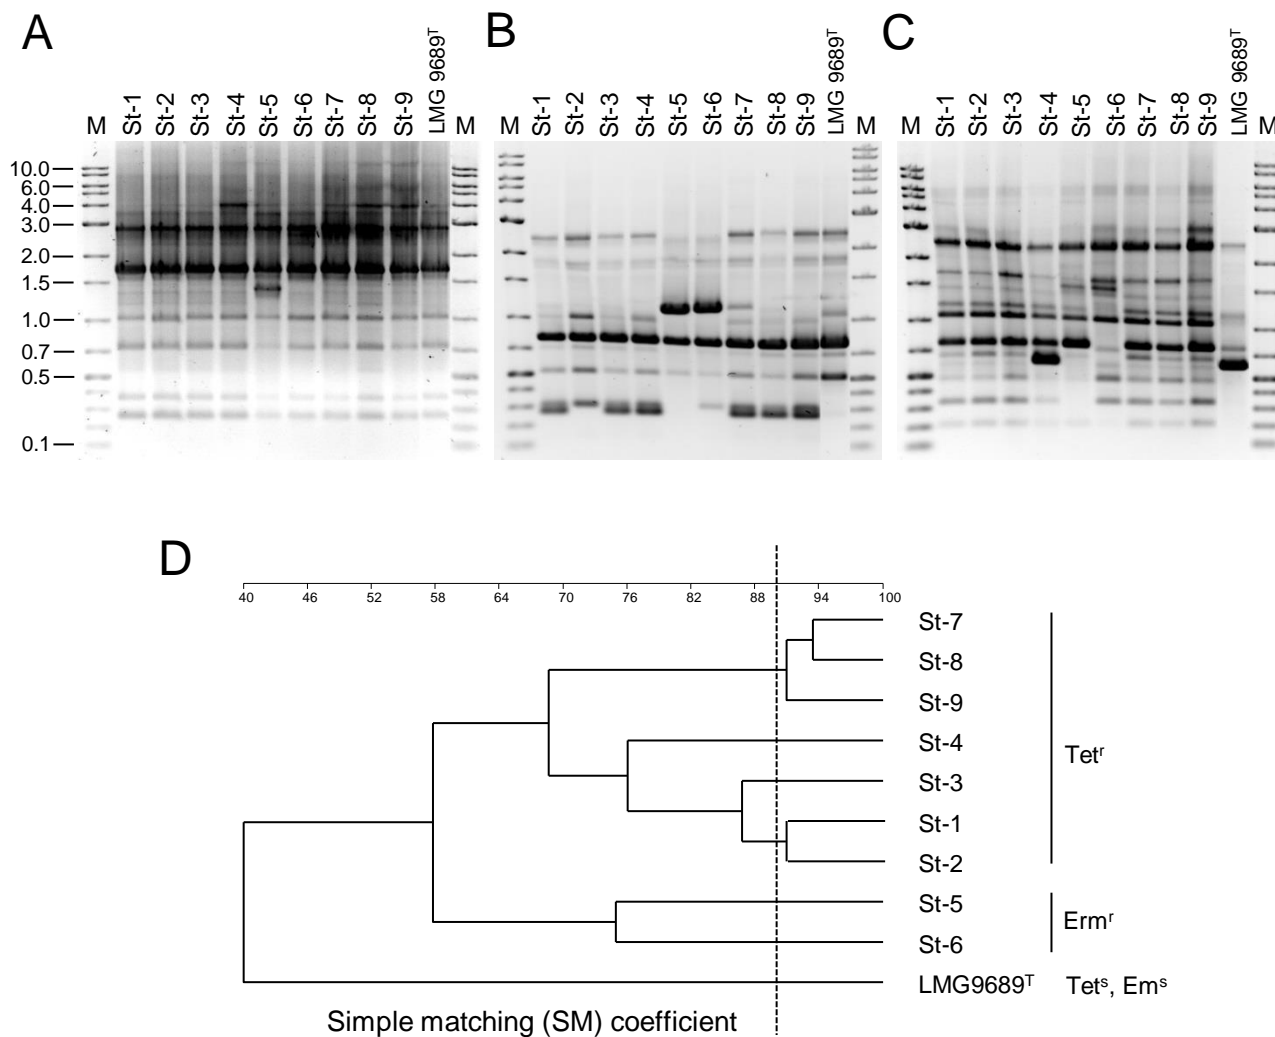

**Supplementary Figure 1.-** Different rep-PCR and RAPD typing profiles, obtained with primers BoxA2R (Panel A), M13 (Panel B) and OPA18 (Panel C), for wild strains of *Streptococcus thermophilus* isolates from milk and traditional cheeses. Below the panels, dendrogram of similarity of the combined typing profiles expressed by the Simple Matching (SM) coefficient. Clustering was performed by the unweighted pair group method using arithmetic averages (UPGMA). In bold, strains subjected to genome sequencing.
